# Supplementary figures and images for: Native and Non-Native Bemisia tabaci NAFME Haplotypes Can Be Implicated in Dispersal of Endemic and Introduced Begomoviruses in Oman
Source: MDPI journal article supplement (doi:10.3390/insects14030268), 2023-03-08

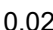

Supplement: s1 [file s1]

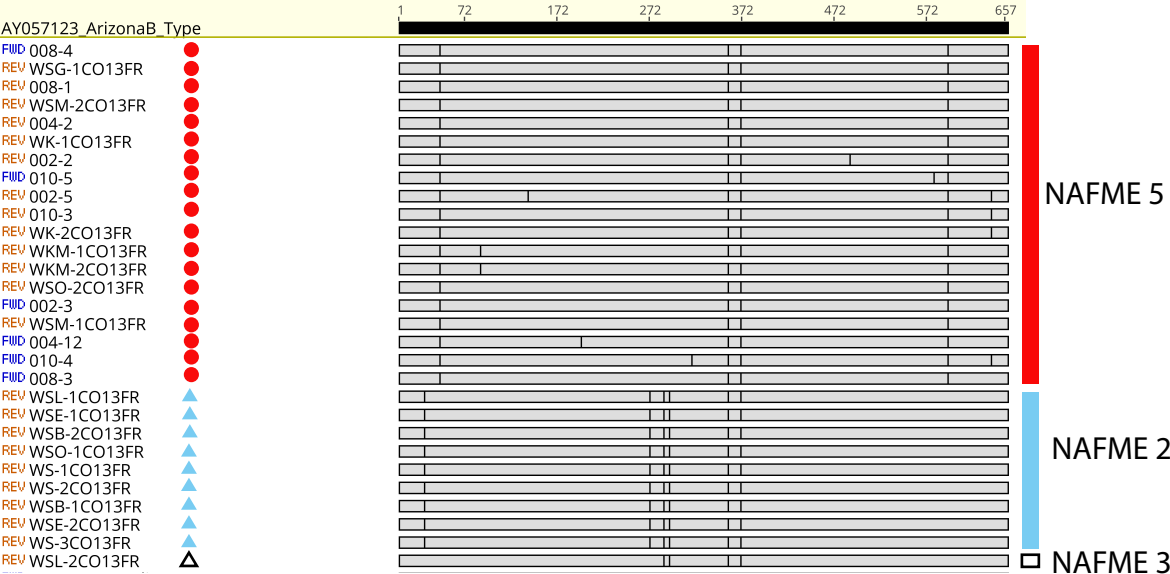

Supplement: s1 [file s1]
